# Supplementary material
Source: publisher site journal article supplement (https://oneecosystem.pensoft.net/article/download/suppl/4362184/)
Supplement: Supplementary file 1

**Appendix: List of all reviewed publications**

| **Global Region** | **OR or OCT** | **Author** | **Title** | **Year** | **Journal** | **Language** |
| --- | --- | --- | --- | --- | --- | --- |
| **Amazonia** | **French Guiana** | Kuenzer, C., Bluemel, A., Gebhardt, S., Quoc, T. V., & Dech, S. | Remote sensing of mangrove ecosystems: A review. | 2011 | Remote Sensing | EN |
|  |  | Rossi, V., Dolley, T., Cornu, G., Guitet, S., Hérault, B. | GuyaSim, a decision-support tool for forest planning: Application in French Guiana | [GuyaSim: Un outil d'aide à la décision pour l'aménagement d'un territoire forestier, la Guyane] | 2015 | Bois et Foret des Tropiques | FR |
|  |  | Schimann, H., Petit-Jean, C., Guitet, S., Reis, T., Domenach, A. M., & Roggy, J. C. | Microbial bioindicators of soil functioning after disturbance: The case of gold mining in tropical rainforests of French Guiana | 2012 | Ecological Indicators | EN |
|  |  | Jaziri, W. | Finding optimal directions for forest trees harvesting using GIS-based techniques | 2007 | Environmental Science and Engineering | EN |
|  |  | Sutton, P. C., Anderson, S. J., Tuttle, B. T., & Morse, L. | The real wealth of nations: Mapping and monetizing the human ecological footprint. | 2012 | Ecological Indicators | EN |
|  |  |  |  |  |  |  |
| **Macaronesia** | **Azores** | Beaumont, N. J., Austen, M. C., Atkins, J. P., Burdon, D., Degraer, S., Dentinho, T. P., ... & Marboe, A. H. | Identification, definition and quantification of goods and services provided by marine biodiversity: implications for the ecosystem approach. | 2007 | Marine Pollution Bulletin | EN |
|  |  | Bragagnolo, C., Pereira, M., Ng, K. & Calado, H. | Understanding and mapping local conflicts related to protected areas in small islands: a case study of the Azores archipelago | 2016 | Environment, Development and Sustainability | EN |
|  |  | Cerqueira, Y., Navarro, L. M., Maes, J., Marta-Pedroso, C., Honrado, J. P., & Pereira, H. M. | Ecosystem services: the opportunities of rewilding in Europe | 2015 | Rewilding European Landscapes | EN |
|  |  | Cruz, A., Benedicto, J., Gil, A. | Socio-economic benefits of Natura 2000 in Azores Islands - A case study approach on ecosystem services provided by a special protected area | 2011 | Journal of Coastal Research | EN |
|  |  | Galparsoro, I., Borja, A., & Uyarra, M. C. | Mapping ecosystem services provided by benthic habitats in the European North Atlantic Ocean | 2014 | Frontiers in Marine Science | EN |
|  |  | Guerreiro, O., Cardoso, P., Ferreira, J. M., Ferreira, M. T., & Borges, P. A. | Potential distribution and cost estimation of the damage caused by Cryptotermes brevis (Isoptera: Kalotermitidae) in the Azores | 2014 | journal of economic entomology | EN |
|  |  | Fonseca, C., Silva, C. P. D., Calado, H., Moniz, F., Bragagnolo, C., Gil, A., ... & Moreira, M. | Coastal and marine protected areas as key elements for tourism in small islands. | 2014 | Journal of Coastal Research | EN |
|  |  | Kettunen, M., & Ten Brink, P. | Social and economic benefits of protected areas: an assessment guide. | 2013 | Routledge | EN |
|  |  | Picanço, A., Gil, A., Rigal, F., & Borges, P. A. | Pollination services mapping and economic valuation from insect communities: a case study in the Azores (Terceira Island). | 2017 | Nature Conservation | EN |
|  |  | Ressurreição, A., Giacomello, E. | Quantifying the direct use value of Condor seamount | 2013 | Deep-Sea Research Part II: Tropical Studies in Oceanography | EN |
|  |  | Ressurreição, A., Gibbons, J., Kaiser, M. et al. | Different cultures, different values: The role of cultural variation in public's WTP for marine species conservation | 2012 | Biological Conservation | EN |
|  |  | Ressurreição, A., Menezes, G., & Giacomello, E. | Assessing the annual revenue of marine industries operating at Condor seamount, Azores. | 2017 | Handbook on the Economics and Management of Sustainable Oceans | EN |
|  |  | Ressurreição, A., Zarzycki, T., Kaiser, M., Edwards-Jones, G., Dentinho, T. P., Santos, R. S., & Gibbons, J. | Towards an ecosystem approach for understanding public values concerning marine biodiversity loss | 2012 | Marine ecology progress series | EN |
|  |  |  |  |  |  |  |
|  |  |  |  |  |  |  |
|  |  |  |  |  |  |  |
|  |  | Vergílio, M., Fjøsne, K., Nistora, A., & Calado, H. | Carbon stocks and biodiversity conservation on a small island: Pico (the Azores, Portugal) | 2016 | Land Use Policy | EN |
|  |  |  |  |  |  |  |
|  | **Canary Islands** | Alonso-Benito, A., Hernandez-Leal, P.A., Arbelo, M., (...), Moreno-Ruiz, J.A., Garcia-Lazaro, J.R. | Satellite image based methods for fuels maps updating | 2016 | Proceedings of SPIE | EN |
|  |  | Tuya, F., Haroun, R., Espino, F. | Economic assessment of ecosystem services: Monetary value of seagrass meadows for coastal fisheries | 2014 | Ocean and Coastal Management | EN |
|  |  | Alonso-Benito, A., Hernandez-Leal, P.A., Gonzalez-Calvo, A., Arbelo, M., Barreto, A. | Analysis of different methods for burnt area estimation using remote sensing and ground truth data | 2008 | International Geoscience and Remote Sensing Symposium | EN |
|  |  | Arévalo, J. R., Mora, J. L., & Chinea, E. | Forage quality of native pastures on Lanzarote Island (Canary Islands) | 2012 | JFAE 10 | EN |
|  |  | Ghermandi, A., & Nunes, P. A | A global map of coastal recreation values: Results from a spatially explicit meta-analysis. | 2013 | Ecological Economics | EN |
|  |  | Martín-Luis, A., Arbelo, M., Hernández-Leal, P., Arbelo-Bayó, M. | Mapping species distribution of Canarian Monteverde forest by field spectroradiometry and satellite imagery | 2016 | Proceedings of SPIE | EN |
|  |  | Murillas-Maza, A., J. Virto, M. C. Gallastegui, P. González and J. Fernández-Macho | The Value of Open Ocean Ecosystems: A Case Study for the Spanish Exclusive Economic Zone | 2011 | Natural Resources Forum | EN |
|  |  | Quintas-Soriano, C., Martín-López, B., Santos-Martín, F., Loureiro, M., Montes, C., Benayas, J., & García-Llorente, M. | Ecosystem services values in Spain: A meta-analysis. | 2016 | Environmental Science and Policy | EN |
|  |  | Scherrer, P., Alonso, A., & Sheridan, L. | Expanding the destination image: Wine tourism in the Canary Islands | 2009 | International Journal of Tourism Research | EN |
|  |  |  |  |  |  |  |
|  | **Madeira** | - |  |  |  |  |
|  |  |  |  |  |  |  |
| **South Atlantic** | **Falkland Islands** | Augé, A. A., Lascelles, B., & Dias, M. | Marine Spatial Planning for the Falkland Islands | 2015 | Methodology for identification of important areas for marine megafauna workshop report. South Atlantic Environmental Research Institute, Stanley, EN Falkland Islands. | EN |
|  |  | Konarska, K. M., Sutton, P. C., & Castellon, M. | Evaluating scale dependence of ecosystem service valuation: a comparison of NOAA-AVHRR and Landsat TM datasets. | 2002 | Ecological Economics | EN |
|  |  | Mulligan, M. | Tropical agriculturalisation: scenarios, their environmental impacts and the role of climate change in determining water-for-food, locally and along supply chains | 2015 | Food Security | EN |
|  |  | Upson, R., McAdam, J., & Clubbe, C. | Climate Change Risk Assessment for Plants and Soils of the Falkland Islands and the Services they provide. | 2016 |  | EN |
|  | **Tristan da Cunha** | - |  |  |  |  |
|  |  |  |  |  |  |  |
|  | **Saint Helena** | Dawson, J., Oppel, S., Cuthbert, R. J., Holmes, N., Bird, J. P., Butchart, S. H., .(..) & Tershy, B. | Prioritizing islands for the eradication of invasive vertebrates in the United Kingdom overseas territories. | 2015 | Conservation Biology | EN |
|  |  | Li, G., & Fang, C. | Global mapping and estimation of ecosystem services values and gross domestic product: A spatially explicit integration of national ‘green GDP’ accounting. | 2014 | Ecological Indicators | EN |
|  | **Ascension Island** | - |  |  |  |  |
|  |  |  |  |  |  |  |
| **Polar and Subpolar** | **Greenland** | Coll, M., Libralato, S., Tudela, S., Palomera, I., & Pranovi, F. | Ecosystem overfishing in the ocean. | 2008 | Plos One | EN |
|  |  | Jakobsson, J., Stefansson, G. | Rational harvesting of the cod-capelin-shrimp complex in the Icelandic marine ecosystem | 1998 |  | EN |
|  |  | Vilhjálmsson, H. | Capelin (Mallotus villosus) in the Iceland–East Greenland–Jan Mayen ecosystem | 2002 | ICES Journal of Marine Science: Journal du Conseil, | EN |
|  | **South Georgia** | Pikitch, E. K., Rountos, K. J., Essington, T. E., Santora, C., Pauly, D., Watson, R., ... & Cury, P. | The global contribution of forage fish to marine fisheries and ecosystems | 2014 | Fish and Fisheries | EN |
|  |  | Clout, M. I. C. K., & De Poorter, M. | Invasive alien species: global lessons and Antarctic implications. | 2008 | Non-native Species in the Antarctic e Proceedings. Gateway Antarctica. New Zealand, Christchurch, | EN |
|  | **Sandwich Islands** | Grant, S. M., Hill, S. L., Trathan, P. N., & Murphy, E. J. | Ecosystem services of the Southern Ocean: trade-offs in decision-making. | 2013 | Antarctic Science | EN |
|  | **British Antarctic Territory (BAT)** | - |  |  |  |  |
|  | **French Southern and Antarctic Territories (TAAF)** | - |  |  |  |  |
|  | **Crozet** | Grant, S. M., Hill, S. L., Trathan, P. N., & Murphy, E. J. | Ecosystem services of the Southern Ocean: trade-offs in decision-making. | 2013 | Antarctic Science | EN |
|  |  | Quétel, C., Marinesque, S., Ringler, D., Fillinger, L., Changeux, T., Marteau, C., & Troussellier, M. | Iles Eparses (SW Indian Ocean) as reference ecosystems for environmental research | 2016 | Acta Oecologica, | EN |
|  |  | Tixier, P., Gasco, N., Duhamel, G., Viviant, M., Authier, M., & Guinet, C. | Interactions of Patagonian toothfish fisheries with killer and sperm whales in the Crozet islands Exclusive Economic Zone: an assessment of depredation levels and insights on possible mitigation strategies. | 2010 | CCAMLR Science | EN/ES/RUS/FR |
|  |  |  |  |  |  |  |
|  | **Kerguelen** | Grant, S. M., Hill, S. L., Trathan, P. N., & Murphy, E. J. | Ecosystem services of the Southern Ocean: trade-offs in decision-making. | 2013 | Antarctic Science | EN |
| **Indian Ocean** | **British Indian Ocean Territory (BIOT)** | Li, G., & Fang, C. | Global mapping and estimation of ecosystem services values and gross domestic product: A spatially explicit integration of national ‘green GDP’ accounting. | 2014 | Ecological Indicators | EN |
|  |  | McClanahan, T. R., Maina, J. M., Graham, N. A., & Jones, K. R. | Modelling reef fish biomass, recovery potential, and management priorities in the western Indian Ocean | 2016 | PloS one | EN |
|  |  | Price, A.R.G., Harris, A., McGowan, A., Venkatachalam, A.J., Sheppard, C.R.C. | Chagos feels the pinch: Assessment of holothurian (sea cucumber) abundance, illegal harvesting and conservation prospects in British Indian Ocean Territory | 2010 | Aquatic Conservation: Marine and Freshwater Ecosystems | EN |
|  |  |  |  |  |  |  |
|  | **Chagos Archipelago** | Gravestock, P., Sheppard, C. | Valuing the ecosystem services of the Chagos: A review of challenges and estimates | 2015 | Marine Ecology Progress Series | EN |
|  | **Reunion Island/la reunion** | Bagny Beilhe, L., Delatte, H., Juliano, S.A., Fontenille, D., Quilici, S. | Ecological interactions in Aedes species on Reunion Island | 2013 | Medical and Veterinary Entomology | EN |
|  |  | Caillaud, A., Damiens, F., Salvat, B., & Wilkinson, C. | Preventing coral grief: a comparison of Australian and French coral reef protection strategies in a changing climate | 2011 | Sustainability Dev. | EN |
|  |  | Delatte, H., David, P., Granier, M., (...), Peterschmitt, M., Reynaud, B. | Microsatellites reveal extensive geographical, ecological and genetic contacts between invasive and indigenous whitefly biotypes in an insular environment | 2006 | Generical Research | EN |
|  |  | Lagabrielle, E., Rouget, M., Le Bourgeois, T., Payet, K., Durieux, L., Baret, S., ... & Strasberg, D. | Integrating conservation, restoration and land-use planning in islands—An illustrative case study in Réunion Island | 2011 | Landscape and Urban Planning | EN |
|  |  | Lagabrielle, E., Botta, A., Daré, W., (...), Aubert, S., Fabricius, C. | Modelling with stakeholders to integrate biodiversity into land-use planning - Lessons learned in Réunion Island (Western Indian Ocean) | 2010 | Environmental Modelling and Software | EN |
|  |  | Li, G., & Fang, C. | Global mapping and estimation of ecosystem services values and gross domestic product: A spatially explicit integration of national ‘green GDP’ accounting. | 2014 | Ecological Indicators | EN |
|  |  | Macdonald, I.A.W., Thébaud, C., Strahm, W.A., Strasberg, D. | Effects of alien plant invasions on native vegetation remnants on la Réunion (mascarene islands, indian ocean) | 1991 | Environmental Conservation | EN |
|  |  | Mustapha, M. A., Lihan, T., & Khalid, L. I. | Coral reef and associated habitat mapping using ALOS satellite imagery. | 2014 | Sains Malaysiana, | EN |
|  |  | Scopélitis, J., Andréfouët, S., Phinn, S., (...), Tourrand, C., Done, T. | Changes of coral communities over 35 years: Integrating in situ and remote-sensing data on Saint-Leu Reef (la Réunion, Indian Ocean) | 2009 | Estuarine, coastal and shelf Science | EN |
|  |  | Sutton, P. C., Anderson, S. J., Tuttle, B. T., & Morse, L. | The real wealth of nations: Mapping and monetizing the human ecological footprint. | 2012 | Ecological Indicators | EN |
|  |  | Tassin, J., Rivière, J.-N., Cazanove, M., Bruzzese, E. | Ranking of invasive woody plant species for management on Réunion Island | 2006 | Weed Research | EN |
|  |  |  |  |  |  |  |
|  | **Mayotte** | Eriksson, H., Robinson, G., Slater, M. J., & Troell, M. | Sea cucumber aquaculture in the Western Indian Ocean: challenges for sustainable livelihood and stock improvement | 2012 | Ambio | EN |
|  |  | Hamilton, S. E., & Casey, D | Creation of a high spatio‐temporal resolution global database of continuous mangrove forest cover for the 21st century (CGMFC‐21) | 2016 | Global Ecology and Biogeography | EN |
|  |  | Hicks, C. C. | How do we value our reefs? Risks and tradeoffs across scales in “biomass-based” economies. | 2011 | Coastal Management | EN |
|  |  | Leal, M. C., Puga, J., Serôdio, J., Gomes, N. C., & Calado, R. | Trends in the discovery of new marine natural products from invertebrates over the last two decades–where and what are we bioprospecting?. | 2012 | PLoS One | EN |
|  |  | Pascal, N., Allenbach, M., Brathwaite, A., Burke, L., Le Port, G., & Clua, E. | Economic valuation of coral reef ecosystem service of coastal protection: A pragmatic approach | 2016 | Ecosystem Services | EN |
|  |  | Sutton, P. C., Anderson, S. J., Costanza, R., & Kubiszewski, I. | The ecological economics of land degradation: Impacts on ecosystem service values | 2016 | Ecological Indicators | EN |
|  |  | Sutton, P. C., Anderson, S. J., Tuttle, B. T., & Morse, L. | The real wealth of nations: Mapping and monetizing the human ecological footprint. | 2012 | Ecological Indicators | EN |
|  |  | Thackway, R. | Protective functions and ecosystem services of global forests in the past quarter-century | 2015 | Forest Ecology and Management | EN |
|  |  | Yap, H. T. | Coral Reef Ecosystems. | 2013 | Earth System Monitoring | EN |
|  |  |  |  |  |  |  |
|  | **Scattered Islands/ Îles Éparses** | Andréfouët, S. | Remote Sensing of Coral Reefs and Their Environments in the Red Sea and Western Indian Ocean: Research and Management. | 2014 | Remote Sensing of the African Seas | EN |
|  |  | Bouvy, M.; Got, P.; Domaizon, I.; et al. | Plankton communities in the five Iles Eparses (Western Indian Ocean) considered to be pristine ecosystems | 2016 | Acta Oecologica | EN |
|  |  | Chabanet, P.; Bigot, L.; Nicet, J. -B.; et al. | Coral reef monitoring in the Iles Eparses, Mozambique Channel (2011-2013) | 2016 | Acta Oecologica | EN |
|  |  | Collin, A., Archambault, P., Planes, S. | Revealing the regime of shallow coral reefs at patch scale by continuous spatial modeling | 2014 | Frontiers in marine science | EN |
|  |  | Dupuy, Christine; Pagano, Marc; Got, Patrice; et al. | Trophic relationships between metazooplankton communities and their plankton food sources in the Iles Eparses (Western Indian Ocean) | 2016 | Marine environmental research | EN |
|  |  |  |  |  |  |  |
| **Pacific** | **New Caledonia** | Caillaud, A., Damiens, F., Salvat, B., & Wilkinson, C. | Preventing coral grief: a comparison of Australian and French coral reef protection strategies in a changing climate | 2011 | Sustainable Development | EN |
|  |  | Chiabai, A., Travisi, C. M., Markandya, A., Ding, H., & Nunes, P. A. | Economic assessment of forest ecosystem services losses: cost of policy inaction | 2010 | Environmental and Resource Economics | EN |
|  |  | Deas, M., Andréfouët, S., Léopold, M., Guillemot, N. | Modulation of habitat-based conservation plans by fishery opportunity costs: A New Caledonia case study using fine-scale catch data | 2014 |  | EN |
|  |  | Del Toro, I., Ribbons, R. R., & Pelini, S. L. | The little things that run the world revisited: a review of ant-mediated ecosystem services and disservices (Hymenoptera: Formicidae). | 2012 | Myrmecological News | EN |
|  |  | Echevarria, G., & Morel, J. L. | Technosols of mining areas | 2015 | Rev Bras Cienc Solo Under press | EN/ES |
|  |  | Fernando, D.R., Woodrow, I.E., Jaffré, T., (...), Marshall, A.T., Baker, A.J.M. | Foliar manganese accumulation by Maytenus founieri (Celastraceae) in its native New Caledonian habitats: Populational variation and localization by X-ray microanalysis | 2008 | New Phytologist | EN |
|  |  | Ferrario, F., Beck, M. W., Storlazzi, C. D., Micheli, F., Shepard, C. C., & Airoldi, L | The effectiveness of coral reefs for coastal hazard risk reduction and adaptation | 2014 | Nature communications | EN |
|  |  | Fluet-Chouinard, E., Lehner, B., Rebelo, L. M., Papa, F., & Hamilton, S. K. | Development of a global inundation map at high spatial resolution from topographic downscaling of coarse-scale remote sensing data | 2015 | Remote Sensing of Environment, | EN |
|  |  | Graham, N. A. J., & Nash, K. L. | The importance of structural complexity in coral reef ecosystems. | 2013 | Coral Reefs | EN |
|  |  | Pelletier, D., Leleu, K., Mallet, D., (...), Boureau, M., Guilpart, N. | Remote high-definition rotating video enables fast spatial survey of marine underwater macrofauna and habitats | 2012 | Plos One | EN |
|  |  | Pouteau, R., Meyer, J.-Y., Stoll, B. | A SVM-based model for predicting distribution of the invasive tree Miconia calvescens in tropical rainforests | 2011 | Ecological Modelling | EN |
|  |  |  |  |  |  |  |
|  |  |  |  |  |  |  |
|  |  |  |  |  |  |  |
|  |  |  |  |  |  |  |
|  |  |  |  |  |  |  |
|  |  |  |  |  |  |  |
|  |  |  |  |  |  |  |
|  |  |  |  |  |  |  |
|  |  |  |  |  |  |  |
|  |  | Konarska, K. M., Sutton, P. C., & Castellon, M. | Evaluating scale dependence of ecosystem service valuation: a comparison of NOAA-AVHRR and Landsat TM datasets. | 2002 | Ecological Economics | EN |
|  |  | Laurans, Y., Pascal, N., Binet, T., Brander, L., Clua, E., David, G., Rojat, D., & Seidl, A. | Economic valuation of ecosystem services from coral reefs in the South Pacific: Taking stock of recent experience | 2013 | Journal of Environmental Management | EN |
|  |  | Littaye, A., Lardon, S., & Alloncle, N. | Stakeholders’ collective drawing reveals significant differences in the vision of marine spatial planning of the western tropical Pacific. | 2016 | Oceans and Coastal Management | EN |
|  |  | Marre, J. B. | Quantifying economic values of coastal and marine ecosystem services and assessing their use in decision-making: applications in New Caledonia and Australia | 2014 | - | EN |
|  |  | Marre, J.B., Brander, L., Thebaud, O., Boncoeur, J., Pascoe, S., Coglan, L. & Pascal, N. | Non-market use and non-use values for preserving ecosystem services over time: A choice experiment application to coral reef ecosystems in New Caledonia | 2015 | Oceans and Coastal Management | EN |
|  |  | Martinez, M. L.; Intralawan, A.; Vazquez, G.; Pérez-Maqueo, O., Sutton, P. & Landgrave, R. | The coasts of our world: Ecological, economic and social importance | 2007 |  | EN |
|  |  | Pascal, N., Allenbach, M., Brathwaite, A., Burke, L., Le Port, G., & Clua, E. | Economic valuation of coral reef ecosystem service of coastal protection: A pragmatic approach. | 2016 | Ecosystem Services | EN |
|  |  | Preuss, Bastien; Pelletier, Dominique; Wantiez, Laurent; et al. | Considering multiple-species attributes to understand better the effects of successive changes in protection status on a coral reef fish assemblage | 2009 | ICES Journal of Marine Science | EN |
|  |  | Teelucksingh, S. S., & Nunes, P. A. | Biodiversity Valuation in Developing Countries: A Focus on Small Island Developing States (SIDS). | 2010 |  | EN |
|  |  | Thibault, Martin; Brescia, Fabrice; Jourdan, Herve; et al. | Invasive rodents, an overlooked threat for skinks in a tropical island hotspot of biodiversity | 2017 | New Zealand Journal of Ecology | EN |
|  |  |  |  |  |  |  |
|  | **Wallis and Futuna** | Kubiszewski, I., Anderson, S. J., Costanza, R., & Sutton, P. C. | The Future of Ecosystem Services in Asia and the Pacific | 2016 | Asia & the Pacific Policy Studies | EN |
|  |  | Littaye, A., Lardon, S., & Alloncle, N. | Stakeholders’ collective drawing reveals significant differences in the vision of marine spatial planning of the western tropical Pacific. | 2016 | Oceans and Coastal Management | EN |
|  |  | Miura, S., Amacher, M., Hofer, T., San-Miguel-Ayanz, J., & Thackway, R. | Protective functions and ecosystem services of global forests in the past quarter-century | 2015 | Forest Ecology and Management | EN |
|  |  | Chape, S. | Review of environmental issues in the pacific region and the role of the pacific regional environment programme. | 2006 | Workshop and symposium on Collaboration for sustainable development of the Pacific Islands: Towards effective e-learning systems on environment (pp. 27-28). | EN |
|  |  | Thackway, R. | Protective functions and ecosystem services of global forests in the past quarter-century | 2015 | Forest Ecology and Management | EN |
|  |  |  |  |  |  |  |
|  | **French Polynesia** | Adam, T.C., Brooks, A.J., Holbrook, S.J., (...), Washburn, L., Bernardi, G. | How will coral reef fish communities respond to climate-driven disturbances? Insight from landscape-scale perturbations | 2014 | Oecologia | EN |
|  |  | Cartier, L., & Ali, S. | Pearl Farming as a Sustainable Development Path: Overcoming Biodiversity Loss | 2012 | Solutions | EN |
|  |  | Chiabai, A., Travisi, C. M., Markandya, A., Ding, H., & Nunes, P. A. | Economic assessment of forest ecosystem services losses: cost of policy inaction | 2010 | Environmental and Resource Economics | EN |
|  |  | Clua, E., & Pascal, N. | Shark-watching ecotourism in the Pacific islands: A move towards “payments for ecosystem services” | 2014 | SPC Fisheries Newsletter | EN |
|  |  | Ghermandi, A., Nunes, P. A., & Onofri, L. | Guidance manual on valuation and accounting of ecosystem services for small island developing states. | 2014 | UNEP | EN |
|  |  | Konarska, K. M., Sutton, P. C., & Castellon, M. | Evaluating scale dependence of ecosystem service valuation: a comparison of NOAA-AVHRR and Landsat TM datasets. | 2002 | Ecological Economics | EN |
|  |  | Kubiszewski, I., Anderson, S. J., Costanza, R., & Sutton, P. C. | The Future of Ecosystem Services in Asia and the Pacific | 2016 | Asia & the Pacific Policy Studies | EN |
|  |  | Leenhardt, P., Low, N., Pascal, N., Micheli, F., & Claudet, J. | The role of marine protected areas in providing ecosystem services. | 2015 | Aquatic functional biodiversity: an ecological and evolutionary perspective. London: Elsevier Inc | EN |
|  |  | Li, G., & Fang, C. | Global mapping and estimation of ecosystem services values and gross domestic product: A spatially explicit integration of national ‘green GDP’ accounting. | 2014 | Ecological Indicators | EN |
|  |  | Meyer, Jean-Yves; Pouteau, Robin; Spotswood, Erica; et al. | The importance of novel and hybrid habitats for plant conservation on islands: a case study from Moorea (South Pacific) | 2015 | Biodiversity and Conservation | EN |
|  |  | Mouillot, D., Bellwood, D. R., Baraloto, C., Chave, J., Galzin, R., Harmelin-Vivien, M., (...) & Paine, C. T. | Rare species support vulnerable functions in high-diversity ecosystems | 2013 | PLoS Biol | EN |
|  |  | Pascal, N., Allenbach, M., Brathwaite, A., Burke, L., Le Port, G., & Clua, E. | Economic valuation of coral reef ecosystem service of coastal protection: A pragmatic approach. | 2016 | Ecosystem Services | EN |
|  |  | Pascal, N. | Coral reef ecosystem services economic valuation experiences from the South Pacific. | 2013 | - | EN |
|  |  | Pierre, L., Vanessa, S., Nicolas, P., Nikolaus, P. W., Annie, A., Tamatoa, B., (...) & Bernard, S. | Exploring social-ecological dynamics of a coral reef resource system using participatory modeling and empirical data. | 2017 | Marine Policy | EN |
|  |  | Ram-Bidesi, V., Lal, P. N., & Conner, N. | Economics of Coastal Zone Management | 2011 | IUCN | EN |
|  |  | Sutton, P. C., Anderson, S. J., Tuttle, B. T., & Morse, L. | The real wealth of nations: Mapping and monetizing the human ecological footprint. | 2012 | Ecological Indicators | EN |
|  |  | Russi, D., Pantzar, M., Kettunen, M., Gitti, G., Mutafoglu, K., Kotulak, M., & ten Brink, P. | Socio-Economic Benefits of the EU Marine Protected Areas. | 2016 | Institute for European Environmental Policy (IEEP) | EN |
|  |  | Van der Ploeg, S., De Groot, R. S., & Wang, Y. | The TEEB Valuation Database: overview of structure, data and results. | 2010 | Wageningen, the Netherlands.: Foundation for Sustainable Development. | EN |
|  |  |  |  |  |  |  |
|  | **Pitcairn** | Chape, S. | Review of environmental issues in the pacific region and the role of the pacific regional environment programme. | 2006 | Workshop and symposium on Collaboration for sustainable development of the Pacific Islands: Towards effective e-learning systems on environment (pp. 27-28). | EN |
|  |  | Kingston, N., Waldren, S. | The plant communities and environmental gradients of Pitcairn Island: The significance of invasive species and the need for conservation management | 2003 | Annals of Botany | EN/FR |
|  |  | Kubiszewski, I., Anderson, S. J., Costanza, R., & Sutton, P. C. | The Future of Ecosystem Services in Asia and the Pacific | 2016 | Asia & the Pacific Policy Studies | EN |
|  |  |  |  |  |  | EN |
|  |  | McNeely, J. A. | An introduction to human dimensions of invasive alien species. | 2001 | The Great Reshuffling: Human Dimensions of Invasive Alien Species. IUCN Publishers, Gland, Switzerland | EN |
|  |  | McNeely, J. A. | As the world gets smaller, the chances of invasion grow. | 2006 | Euphytica | EN |
|  |  | Russi, D., Pantzar, M., Kettunen, M., Gitti, G., Mutafoglu, K., Kotulak, M., & ten Brink, P. | Socio-Economic Benefits of the EU Marine Protected Areas. | 2016 | Institute for European Environmental Policy (IEEP) | EN |
|  |  |  |  |  |  |  |
| **Caribbean** | **Cayman Islands** | Agard J, Cropper AN, Aquing P, Attzs M, Arias F, Beltran J, Bennett E, Carnegie R, Clauzel S, Corredor J, Creary M. | Caribbean Sea ecosystem assessment (CARSEA) | 2007 | Caribbean Mar Stud | EN |
|  |  | Brander, L., McKenzie, E., Tompkins, E., & Beukering, P. V. | Valuing the environment in small islands: An environmental economics toolkit. | 2007 | - | EN |
|  |  | Camp, E. F., Suggett, D. J., Gendron, G., Jompa, J., Manfrino, C., & Smith, D. J. | Mangrove and seagrass beds provide different biogeochemical services for corals threatened by climate change. | 2016 | Frontiers in Marine Science | EN |
|  |  | Clubbe, C., & Hamilton, M. | Implementing the GSPC in the Caribbean UK overseas territories | 2009 | Revista del Jardín Botánico Nacional | EN |
|  |  | Clubbe, C., Hamilton, M., Corcoran, M. | Using the Global Strategy for Plant Conservation to guide conservation implementation in the UK Overseas Territories | 2010 | KEW Bulletin | EN |
|  |  |  |  |  |  | EN |
|  |  | Dinerstein, E., Olson, D. M., Graham, D. J., Webster, A. L., Primm, S. A., Bookbinder, M. P., (...) & Young, K. R. | A conservation assessment of the terrestrial ecoregions of Latin America and the Caribbean | 1995 | Washington, DC: World Bank. | EN |
|  |  | Li, G., & Fang, C. | Global mapping and estimation of ecosystem services values and gross domestic product: A spatially explicit integration of national ‘green GDP’accounting. | 2014 | Ecological Indicators | EN |
|  |  | Loya, Y., Eyal, G., Treibitz, T., Lesser, M. P., & Appeldoorn, R. | Theme section on mesophotic coral ecosystems: advances in knowledge and future perspectives. | 2016 | Coral Reefs | EN |
|  |  | Mackay, E. A., Mackay, E. A., Spencer, A., & Spencer, A. | The future of Caribbean tourism: competition and climate change implications. | 2017 | Worldwide Hospitality and Tourism Themes | EN |
|  |  | Pérez-Maqueo, O., Intralawan, A., & Martínez, M. L. | Coastal disasters from the perspective of ecological economics | 2007 | Ecological Economics | EN |
|  |  | Price, A. R. | The marine food chain in relation to biodiversity. | 2001 | The Scientific World Journal |  |
|  |  | Teelucksingh, S., Eckert, S., & ALD Nunes, P. | Marine turtles, ecosystem services and human welfare in the marine ecosystems of the Caribbean Sea: a discussion of key methodologies. | 2010 | Études caribéennes | EN/FR |
|  |  | van Beukering, P., Brouwer, R., Schep, S., Wolfs, E., Brander, L., Ebanks-Petrie, G., & Austin, T. | The impact of invasive species on tourism. | 2014 | - | EN |
|  |  | van Beukering, P., Sarkis, S., van der Putten, L., & Papyrakis, E. | Bermuda׳ s balancing act: The economic dependence of cruise and air tourism on healthy coral reefs. | 2015 | Ecosystem Services | EN |
|  |  | Van Tussenbroek, B. I., Cortés, J., Collin, R., Fonseca, A. C., Gayle, P. M., Guzmán, H. M., (...) & Rodríguez-Ramirez, A. | Caribbean-wide, long-term study of seagrass beds reveals local variations, shifts in community structure and occasional collapse. | 2014 | Plos One | EN |
|  |  |  |  |  |  |  |
|  | **Turks and Caicos Islands** | Baker, S., Paddock, J., Smith, A. M., Unsworth, R. K., Cullen-Unsworth, L. C., & Hertler, H. | An ecosystems perspective for food security in the Caribbean: seagrass meadows in the Turks and Caicos Islands | 2015 | Ecosystem Services | EN |
|  |  | Clubbe, C., & Hamilton, M. | Implementing the GSPC in the Caribbean UK overseas territories | 2009 | Revista del Jardín Botánico Nacional, | EN |
|  |  | Clubbe, C., Hamilton, M., Corcoran, M. | Using the Global Strategy for Plant Conservation to guide conservation implementation in the UK Overseas Territories | 2010 | KEW Bulletin | EN |
|  |  | Cooley, S. R., Lucey, N., Kite‐Powell, H., & Doney, S. C. | Nutrition and income from molluscs today imply vulnerability to ocean acidification tomorrow | 2012 | Fish and Fisheries | EN |
|  |  | Green, E.P., Mumby, P.J., Edwards, A.J., Clark, C.D., Ellis, A.C. | Estimating leaf area index of mangroves from satellite data | 1997 | Aquatic Botany | EN |
|  |  | Harborne, A. R., Mumby, P. J., Kappel, C. V., Dahlgren, C. P., Micheli, F., Holmes, K. E., & Brumbaugh, D. R. | Tropical coastal habitats as surrogates of fish community structure, grazing, and fisheries value. | 2008 | Ecological Applications | EN |
|  |  | Lam, N.S.-N., Qiang, Y., Arenas, H., Brito, P., Liu, K.-B. | Mapping and assessing coastal resilience in the Caribbean region | 2015 | Cartography and Geographic Information Science | EN |
|  |  | Li, G., & Fang, C. | Global mapping and estimation of ecosystem services values and gross domestic product: A spatially explicit integration of national ‘green GDP’ accounting. | 2014 | Ecological Indicators | EN |
|  |  | Micheli, F., Mumby, P. J., Brumbaugh, D. R., Broad, K., Dahlgren, C. P., Harborne, A. R., (...) & Sanchirico, J. N. | High vulnerability of ecosystem function and services to diversity loss in Caribbean coral reefs. | 2014 | Biological conservation | EN |
|  |  | Mumby, PJ; Harborne, AR | Development of a systematic classification scheme of marine habitats to facilitate regional management and mapping of Caribbean coral reefs | 1999 | Biological Conservation | EN |
|  |  | Zeller, D., Booth, S., Mohammed, E., & Pauly, D. | From Mexico to Brazil: Central Atlantic fisheries catch trends and ecosystem models. | 2003 | Fisheries Centre Research Reports | EN |
|  |  |  |  |  |  |  |
|  | **Bermuda** | Brander, L., McKenzie, E., Tompkins, E., & Beukering, P. V. | Valuing the environment in small islands: An environmental economics toolkit. | 2007 | - | EN |
|  |  |  |  |  |  | EN |
|  |  | Kleisner, K. M., Longo, C., Coll, M., Halpern, B. S., Hardy, D., Katona, S. K., (...) & Scarborough, C. | Exploring patterns of seafood provision revealed in the global Ocean Health Index | 2013 | Ambio | EN |
|  |  | Pérez-Maqueo, O., Intralawan, A., & Martínez, M. L. | Coastal disasters from the perspective of ecological economics | 2007 | Ecological Economics | EN |
|  |  | Pendleton, L., Krowicki, F., Strosser, P., & Hallett-Murdoch, J. | Assessing the value of marine and coastal ecosystem services in the Sargasso Sea. | 2014 | - | EN |
|  |  | Potts, S. G., Biesmeijer, J. C., Kremen, C., Neumann, P., Schweiger, O., & Kunin, W. E. | Global pollinator declines: trends, impacts and drivers. | 2010 | Trends in ecology & evolution, | EN |
|  |  | Ricciardi, A. | Invasive species | 2013 | Ecological Systems | EN |
|  |  | Sarkis, S., van Beukering, P. J., McKenzie, E., Hess, S., Brander, L., Roelfsema, M., (...) & Bervoets, T. | Total Economic Value of Bermuda’s Coral Reefs Valuation of Ecosystem Services | 2010 | Report for the Department of Conservation Services of the Government of Bermuda. | EN |
|  |  | van Beukering, P., Sarkis, S., van der Putten, L., & Papyrakis, E. | Bermuda׳ s balancing act: The economic dependence of cruise and air tourism on healthy coral reefs | 2015 | Ecosystem Services | EN |
|  |  |  |  |  |  |  |
|  | **British Virgin Islands** | Beets, J., & Hixon, M. A. | Distribution, persistence, and growth of groupers (Pisces: Serranidae) on artificial and natural patch reefs in the Virgin Islands | 1994 | Bulletin of Marine Science | EN |
|  |  | Green, E., & Donnelly, R. | Recreational scuba diving in Caribbean marine protected areas: Do the users pay?. | 2003 | AMBIO: A Journal of the Human Environment, | EN |
|  |  | Morissette, L., Kaschner, K., & Gerber, L. R. | ‘Whales eat fish’? Demystifying the myth in the Caribbean marine ecosystem. | 2010 | Fish and Fisheries | EN |
|  |  | Sagarra, L. A., & Peterkin, D. D. | Invasion of the Carribean by the hibiscus mealybug, Maconellicoccus hirsutus Green [Homoptera: Pseudococcidae]. | 1999 | Phytoprotection | EN |
|  |  |  |  |  |  |  |
|  | **Anguilla** | Philip, K. P., & Kuruvila, M. | Studies on the biology and fishery of the fishes of the family Priacanthidae (Pisces: Perciformes) of Indian waters | 1994 | Dissertation | EN |
|  | **Saint Martin** | - |  |  |  |  |
|  |  |  |  |  |  |  |
|  | **Sint Maarten** | Bervoets, T. | Working Paper on the Economic Valuation of Country St. Maarten’s Coral Reef Resource | 2010 | Nature Foundation St. Maarten | EN |
|  | **Saint Barthélemy** | Angelelli, P., & Saffache, P. | Algumas reflexões sobre manguezais nas Pequenas Antilhas | 2013 | Revista de Gestão Costeira Integrada | PT |
|  | **Gouadeloupe** | Agard J., Cropper, A.N., Aquing, P., Attzs, M., Arias, F., Beltran, J., Bennett, E., Carnegie, R., Clauzel, S., Corredor, J., Creary, M. | Caribbean Sea ecosystem assessment (CARSEA) | 2007 | Caribbean Mar Stud | EN |
|  |  | Avau, J., Cunha-Lignon, M., De Myttenaere, B., Godart, M. F., & Dahdouh-Guebas, F. | The commercial images promoting Caribbean mangroves to tourists: Case studies in Jamaica, Guadeloupe and Martinique. | 2011 | Journal of Coastal Research | EN |
|  |  | Chopin, P., Dore, T., Guinde, L. et al. | MOSAICA: A multi-scale bioeconomic model for the design and ex ante assessment of cropping system mosaics | 2015 | Agricultural Systems | EN |
|  |  | Chopin, P., Blazy, J.M., Dore, T. | A new method to assess farming system evolution at the landscape scale | 2015 | Agronomy for Sustainable Development | EN |
|  |  | Day, M. | Challenges to sustainability in the Caribbean karst | 2010 | Geologia Croatica | EN |
|  |  | Joseph, P. | The Spatio-Temporal Interfaces within the Lesser Antilles Vegetation (The Example of the Island of Martinique). | 2016 | Open Access Library Journal | EN |
|  |  | Konarska, K. M., Sutton, P. C., & Castellon, M. | Evaluating scale dependence of ecosystem service valuation: a comparison of NOAA-AVHRR and Landsat TM datasets. | 2002 | Ecological Economics | EN |
|  |  | Liquete, C., Somma, F., & Maes, J. | A clear delimitation of coastal waters facing the EU environmental legislation: from the Water Framework Directive to the Marine Strategy Framework Directive. | 2011 | Environmental Science & Policy | EN |
|  |  |  |  |  |  |  |
|  | **Martinique** | Avau, J., Cunha-Lignon, M., De Myttenaere, B., Godart, M. F., & Dahdouh-Guebas, F. | The commercial images promoting Caribbean mangroves to tourists: Case studies in Jamaica, Guadeloupe and Martinique. | 2011 | Journal of Coastal Research | EN |
|  |  | Binet, T., de Battisti, A. B., & Failler, P. | Valuing marine and coastal ecosystems. | 2011 | Oceans: the new frontier. | EN |
|  |  | Chopin, P., Blazy, J. M., Guinde, L., & Doré, T. | A spatially explicit multi-scale bioeconomic model to design and assess agricultural landscapes | 2015 | 2015; The 5th International Symposium for Farming Systems Design, Montpellier, FRA | EN |
|  |  | Failler, P., Petre, E., Binet, T., & Maréchal, J. P. | Valuation of marine and coastal ecosystem services as a tool for conservation: The case of Martinique in the Caribbean | 2015 | Ecosystem Services | EN |
|  |  | Fanning, L., Mahon, R., & McConney, P. | Towards marine ecosystem-based management in the wider Caribbean | 2011 | Amsterdam University Press | EN |
|  |  | Fanning, L. P., & Oxenford, H. A. | Ecosystem issues pertaining to the flyingfish fisheries of the Eastern Caribbean. Towards marine ecosystem-based management in the Wider Caribbean, | 2011 | Amsterdam University Press | EN |
|  |  | Gaba, S., Lescourret, F., Boudsocq, S., Enjalbert, J., Hinsinger, P., Journet, E. P., (...) & Pelzer, E. | Multiple cropping systems as drivers for providing multiple ecosystem services: from concepts to design. | 2015 | Agronomy for Sustainable Development | EN |
|  |  | Gobert, B. | Comparative assessment of multispecies reef fish resources in the Lesser Antilles | 2000 | Fisheries Research | EN |
|  |  | Hamilton, S. E., & Casey, D. | Creation of a high spatio‐temporal resolution global database of continuous mangrove forest cover for the 21st century (CGMFC‐21) | 2016 | Global Ecology and Biogeography | EN |
|  |  | Jackson, L. E., Rosenstock, T., Thomas, M., Wright, J., & Symstad, A. | Managed ecosystems: biodiversity and ecosystem functions in landscapes modified by human use. | 2009 | Biodiversity, Ecosystem Functioning, and Human Wellbeing: An Ecological and Economic Perspective | EN |
|  |  | Laurans, Y., Pascal, N., Binet, T., Brander, L., Clua, E., David, G., (...) & Seidl, A. | Economic valuation of ecosystem services from coral reefs in the South Pacific: Taking stock of recent experience | 2013 | Journal of environmental management, | EN |
|  |  | Liquete, C., Somma, F., & Maes, J | A clear delimitation of coastal waters facing the EU environmental legislation: from the Water Framework Directive to the Marine Strategy Framework Directive. | 2011 | Environmental Science & Policy | EN |
|  |  | Morissette, L., Kaschner, K., & Gerber, L. R. | ‘Whales eat fish’? Demystifying the myth in the Caribbean marine ecosystem. | 2010 | Fish and Fisheries | EN |
|  |  | Schleupner, C. | Evaluation of coastal squeeze and its consequences for the Caribbean island Martinique. | 2008 | Ocean and Coastal Management | EN |
|  |  |  |  |  |  | EN |
|  | **Sint Eustatius** | Evans, T.A., Forschler, B.T., & Grace J.K. | Biology of invasive termites: a worldwide review | 2013 | Annual Review of entomology | EN |
|  |  | Green, E., & Donnelly, R. | Recreational scuba diving in Caribbean marine protected areas: Do the users pay?. | 2003 | AMBIO: A Journal of the Human Environment, | EN |
|  |  | Polman, N., Reinhard, S., van Bets, L. K., & Kuhlman, T. | Governance of ecosystem services on small islands: three contrasting cases for St. Eustatius in the Dutch Caribbean. | 2016 | Island Studies Journal | EN |
|  |  | Tieskens, K. F., Schep, S. W., van Beukering, P. J. H., van Beek, I. J. M., & Wolfs, E. M | Mapping the economic value of ecosystems on St Eustatius. | 2014 | - | EN |
|  |  | Morissette, L., Kaschner, K., & Gerber, L. R. | ‘Whales eat fish’? Demystifying the myth in the Caribbean marine ecosystem. | 2010 | Fish and Fisheries | EN |
|  |  | van Beukering, P., & Slootweg, R. | Valuation of ecosystem services and Strategic Environmental Assessment. Inﬂuential case studies | 2009 | Biodiversity in Environmental Assessment: Enhancing Ecosystem Services for Human Well-Being | EN |
|  |  | Waite, R., Kushner, B., Jungwiwattanaporn, M., Gray, E., & Burke, L. | Use of coastal economic valuation in decision making in the Caribbean: Enabling conditions and lessons learned. | 2015 | Ecosystem Services | EN |
|  |  |  |  |  |  |  |
|  | **Saba** | Tieskens, K. F., Schep, S. W., van Beukering, P. J. H., van Beek, I. J. M., & Wolfs, E. M. | Mapping the Economic Value of Ecosystems on Saba. | 2014 | - | EN |
|  |  | van Beukering, P., & Slootweg, R. | Valuation of ecosystem services and Strategic Environmental Assessment. Inﬂuential case studies | 2009 | Biodiversity in Environmental Assessment: Enhancing Ecosystem Services for Human Well-Being | EN |
|  | **Aruba** | - |  |  |  |  |
|  |  |  |  |  |  |  |
|  | **Montserrat** | Peh, K. S., Balmford, A., Birch, J. C., Brown, C., Stuart, H., Butchart, M., ... & Hughes, R. | Potential impact of invasive alien species on ecosystem services provided by a tropical forested ecosystem: a case study from Montserrat | 2015 | Biological Invasions | EN |
|  |  | Van Beukering, P., Brander, L., Immerzeel, D., Leotaud, N., Mendes, s., van Soesbergen, A., Gerald, C., McCauley, C. | Value after the volcano: Economic valuation of Montserrat’s Centre Hills | 2008 | K OTEP, RSPB, Joint Nature Conservation Committee, Van Beukering Consulting, Montserrat Centre Hills Project, Vrije Universiteit Amsterdam | EN |
|  |  |  |  |  |  |  |
|  | **Bonaire** | Ghermandi, A., & Nunes, P. A. | A Global Map of Costal Recreation Values: Results From a Spatially Explicit Based Meta-Analysis. | 2011 | papers.ssrn.com | EN |
|  |  | Ghermandi, A., Nunes, P. A., & Onofri, L. | Guidance manual on valuation and accounting of ecosystem services for small island developing states. | 2014 | UNEP | EN |
|  |  | Kushner, B., Jungwiwattanaporn, M., Waite, R., & Burke, L. | Influence of coastal economic valuations in the Caribbean: enabling conditions and lessons learned. | 2012 |  | EN |
|  |  | Parsons, G. R., & Thur, S. M. | Valuing changes in the quality of coral reef ecosystems: a stated preference study of SCUBA diving in the Bonaire National Marine Park. | 2008 | Environmental and Resource Economics, | EN |
|  |  | Roberts, M., Hanley, N., & Cresswell, W. | User fees across ecosystem boundaries: Are SCUBA divers willing to pay for terrestrial biodiversity conservation? | 2017 | Journal of Environmental Management, | EN |
|  |  | Schep, S., Johnson, A., van Beukering, P., & Wolfs, E. | The fishery value of coral reefs in Bonaire. | 2012 | IVM Institute for Enironmental Studies, Amsterdam | EN |
|  |  | van der Lely, J. A. C., van Beukering, P., Muresan, L., Cortes, D. Z., Wolfs, E., & Schep, S. | The total economic value of nature on Bonaire | 2013 | IVM Institute for Environmental Studies, Amsterdam. | EN |
|  |  | van Zanten, B., & van Beukering, P. | Coastal Protection services of coral reefs in Bonaire. | 2012 | - | EN |
|  |  | Waite, R., Burke, L., Gray, E., van Beukering, P., Brander, L., Mackenzie, E., ... & Tompkins, E. L. | Coastal capital: ecosystem valuation for decision making in the Caribbean. | 2014 | World Resources Institute | EN |
|  |  |  |  |  |  |  |
|  | **Curacao** | Polman, N., Reinhard, S., van Bets, L. K., & Kuhlman, T. | Governance of ecosystem services on small islands: three contrasting cases for St. Eustatius in the Dutch Caribbean. | 2016 | Island Studies Journal | EN |
